# Supplementary material for: Bio-based antimicrobial nanocomposites derived from tannery waste for functional leather coating: circular valorization of chrome shaving dust
Source: Royal Society of Chemistry journal article supplement (doi:10.1039/d5ma01510c), 2026-01-01
Supplement: d5ma01510c1.pdf [file d5ma01510c1.pdf]

## Supporting Information

### Bio-Based Nanocomposites Derived from Tannery Waste for Antimicrobial Coatings Functional Leather: Circular Valorization of Chrome Shaving Dust

Sharmin Akter Liza,<sup>a</sup> Md. Abdulla-Al-Mamun,<sup>\*a</sup> Md. Nazmul Islam,<sup>a</sup> Md. Rezaul Karim Rana,<sup>b</sup> and  
Md. Shariful Islam<sup>c</sup>

<sup>a</sup> Institute of Leather Engineering and Technology, University of Dhaka, 44-50 Hazaribagh, Dhaka-  
1209, Bangladesh

<sup>b</sup> Molecular Biology Laboratory, Dept. of Biochemistry and Molecular Biology, Faculty of  
Biological Sciences, University of Dhaka, Dhaka 1000, Bangladesh

<sup>c</sup> Department of Veterinary and Animal Sciences, University of Rajshahi, Rajshahi-6205, Bangladesh

**Table S1:** Amino Acid Analysis of protein

| No. | Compound Name | Amount (mg/g) | Amount (g/100g protein) | % of<br>Amino<br>acid |
|-----|---------------|---------------|-------------------------|-----------------------|
| 1   | Aspartic Acid | 34.12         | 3.412                   | 8                     |
| 2   | Threonine     | 7.54          | 0.754                   | 2                     |
| 3   | Serine        | 12.312        | 1.2312                  | 3                     |
| 4   | Glutamic Acid | 60.116        | 6.0116                  | 14                    |
| 5   | Glycine       | 134.829       | 13.4829                 | 31                    |
| 6   | Alanine       | 56.87         | 5.687                   | 13                    |
| 7   | Cystine       | 14.645        | 1.4645                  | 3                     |
| 8   | Valine        | 12.51         | 1.251                   | 3                     |
| 9   | Methionine    | 1.075         | 0.1075                  | 0                     |
| 10  | Isoleucine    | 5.756         | 0.5756                  | 1                     |
| 11  | Leucine       | 11.381        | 1.1381                  | 3                     |
| 12  | Tyrosine      | 1.746         | 0.1746                  | 0                     |
| 13  | Phenylalanine | 7.421         | 0.7421                  | 2                     |
| 14  | Histidine     | 6.817         | 0.6817                  | 2                     |
| 15  | Lysine        | 21.081        | 2.1081                  | 5                     |
| 16  | Arginine      | 40.148        | 4.0148                  | 9                     |
| 17  | Proline       | 97.133        | 9.7133                  | 23                    |
|     | Total         | 428.368       |                         |                       |
|     | Proline       | 97.133        |                         | 18                    |
|     | Total         | 525.501       |                         |                       |

**Table S2:** Results of dry rub fastness test

| No of cycle | Grey Scale Rating |          |          |          |          | Standard value                                             |
|-------------|-------------------|----------|----------|----------|----------|------------------------------------------------------------|
|             | Sample 1          | Sample-2 | Sample-3 | Sample-4 | Sample-5 |                                                            |
| 08          | 5                 | 5        | 5        | 5        | 5        | After 1024 cycles, greyscale ratings should be between 5-3 |
| 16          | 5                 | 5        | 5        | 5        | 5        |                                                            |
| 32          | 5                 | 5        | 5        | 5        | 5        |                                                            |
| 64          | 5                 | 5        | 5        | 5        | 5        |                                                            |
| 128         | 5                 | 5        | 5        | 5        | 5        |                                                            |
| 256         | 5                 | 5        | 5        | 5        | 5        |                                                            |
| 512         | 4                 | 4        | 4/5      | 4/5      | 5        |                                                            |
| 1024        | 4/5               | 4/5      | 4/5      | 4/5      | 5        |                                                            |

**Table S3:** Results of wet rub fastness test

| No of cycle | Greyscale rating |          |          |          |          | Standard value                                            |
|-------------|------------------|----------|----------|----------|----------|-----------------------------------------------------------|
|             | Sample 1         | Sample-2 | Sample-3 | Sample-4 | Sample-5 |                                                           |
| 08          | 5                | 5        | 5        | 5        | 5        | After 512 cycles, greyscale ratings should be between 5-3 |
| 16          | 5                | 5        | 5        | 5        | 5        |                                                           |
| 32          | 5                | 5        | 5        | 5        | 5        |                                                           |
| 64          | 5                | 5        | 5        | 5        | 5        |                                                           |
| 128         | 5                | 4/5      | 4/5      | 4/5      | 5        |                                                           |
| 256         | 4/5              | 4/5      | 4/5      | 4/5      | 5        |                                                           |
| 512         | 4/5              | 4        | 4/5      | 4/5      | 4/5      |                                                           |

**Table S4:** Results of heat fastness of leather.

| Temperature (°C) | Grey Scale Rating |          |          |          |          | Standard value              |
|------------------|-------------------|----------|----------|----------|----------|-----------------------------|
|                  | Sample 1          | Sample-2 | Sample-3 | Sample-4 | Sample-5 |                             |
| 100              | 5                 | 5        | 5        | 5        | 5        | Greyscale ratings should be |

|     |     |   |     |     |     |                |
|-----|-----|---|-----|-----|-----|----------------|
| 125 | 5   | 5 | 5   | 5   | 5   | between<br>5-3 |
| 150 | 5   | 5 | 5   | 5   | 4/5 |                |
| 175 | 4/5 | 4 | 4/5 | 4/5 | 4/5 |                |
| 200 | 4   | 4 | 4   | 4/5 | 4   |                |

**Table S5:** Results of water vapor permeability.

| Samples                                                 | Sample 1 | Sample-2 | Sample-3 | Sample-4 | Sample-5 | Standard<br>value                                             |
|---------------------------------------------------------|----------|----------|----------|----------|----------|---------------------------------------------------------------|
| Water vapor<br>permeability<br>(mg/cm <sup>2</sup> -hr) | 10       | 4        | 4        | 7.90     | 2.3      | Minimum<br>0.8<br>mg/cm <sup>2</sup> -hr<br>for shoe<br>upper |

**Table S6:** Results for bond strength of the sample.

| Samples              | Sample 1 | Sample-2 | Sample-3 | Sample-4 | Sample-5 | Standard<br>value |
|----------------------|----------|----------|----------|----------|----------|-------------------|
| Bond<br>strength (g) | 275      | 275      | 300      | 275      | 325      | Minimum<br>250 g  |

**Table S7:** Zone of inhibition (ZOI) values for the four nanocomposite samples were compared against the known antibiotic positive control and the negative control to evaluate antimicrobial activity based on **Fig. S4**.

| Bacterial        | Replicate<br># | Protein-<br>ZnO (S-<br>1) | Ag-<br>Protein<br>(S-2) | PANI/Protein-<br>ZnO(S-3) | PANI/Ag-<br>Protein(S-4) | Negative<br>Control<br>(Protein,<br>S-5) | Positive<br>Control<br>(PRL<br>100) |
|------------------|----------------|---------------------------|-------------------------|---------------------------|--------------------------|------------------------------------------|-------------------------------------|
| <i>B. cereus</i> | 1              | 19.3                      | 17                      | 14                        | 12                       | 0                                        | 21                                  |
|                  | 2              | 20                        | 16                      | 15                        | 13                       | 0                                        | 22                                  |
|                  | 3              | 20.3                      | 18                      | 16                        | 14                       | 0                                        | 23                                  |

| Comparison           |           | p-values    |     |               |          | Significant |          |
|----------------------|-----------|-------------|-----|---------------|----------|-------------|----------|
| Sample 1 vs Negative |           | 0.000222326 |     |               |          | Significant |          |
| Sample 1 vs Positive |           | 0.046501126 |     |               |          | Significant |          |
| Sample 2 vs Negative |           | 0.001151411 |     |               |          | Significant |          |
| Sample 2 vs Positive |           | 0.003602233 |     |               |          | Significant |          |
| Sample 3 vs Negative |           | 0.001478197 |     |               |          | Significant |          |
| Sample 3 vs Positive |           | 0.001016663 |     |               |          | Significant |          |
| Sample 4 vs Negative |           | 0.00196657  |     |               |          | Significant |          |
| Sample 4 vs Positive |           | 0.000385068 |     |               |          | Significant |          |
| Bacterial            | Replicate | Protein-    | Ag- | PANI/Protein- | PANI/Ag- | Negative    | Positive |

|                | # | ZnO (S-1) | Protein (S-2) | ZnO(S-3) | Protein(S-4) | Control (Protein, S-5) | Control (PRL 100) |
|----------------|---|-----------|---------------|----------|--------------|------------------------|-------------------|
| <i>E. coli</i> | 1 | 18        | 21.5          | 12       | 12           | 0                      | 21                |
|                | 2 | 19        | 22            | 12.5     | 13           | 0                      | 22                |
|                | 3 | 20        | 22.5          | 11.5     | 14           | 0                      | 23                |

| Comparison           | p-values    | Significant     |
|----------------------|-------------|-----------------|
| Sample 1 vs Negative | 0.000922084 | Significant     |
| Sample 1 vs Positive | 0.021311641 | Significant     |
| Sample 2 vs Negative | 0.000172132 | Significant     |
| Sample 2 vs Positive | 1           | Not Significant |
| Sample 3 vs Negative | 0.000578202 | Significant     |
| Sample 3 vs Positive | 0.000651453 | Significant     |
| Sample 4 vs Negative | 0.00196657  | Significant     |
| Sample 4 vs Positive | 0.000385068 | Significant     |

| Antibiotic | Bacteria        | Comparison           | p-values    | Significant |
|------------|-----------------|----------------------|-------------|-------------|
| PRL 100    | <i>B.cereus</i> | Sample 1 vs Negative | 0.000222326 | Significant |
|            |                 | Sample 1 vs Positive | 0.046501126 | Significant |
|            |                 | Sample 2 vs Negative | 0.001151411 | Significant |
|            |                 | Sample 2 vs Positive | 0.003602233 | Significant |
|            |                 | Sample 3 vs Negative | 0.001478197 | Significant |
|            |                 | Sample 3 vs Positive | 0.001016663 | Significant |
|            |                 | Sample 4 vs Negative | 0.00196657  | Significant |
|            |                 | Sample 4 vs Positive | 0.000385068 | Significant |

| Antibiotic | Bacteria      | Comparison           | p-values    | Significant     |
|------------|---------------|----------------------|-------------|-----------------|
| PRL 100    | <i>E.coli</i> | Sample 1 vs Negative | 0.000922084 | Significant     |
|            |               | Sample 1 vs Positive | 0.021311641 | Significant     |
|            |               | Sample 2 vs Negative | 0.000172132 | Significant     |
|            |               | Sample 2 vs Positive | 1           | Not Significant |

|  |  |                      |             |             |
|--|--|----------------------|-------------|-------------|
|  |  | Sample 3 vs Negative | 0.000578202 | Significant |
|  |  | Sample 3 vs Positive | 0.000651453 | Significant |
|  |  | Sample 4 vs Negative | 0.00196657  | Significant |
|  |  | Sample 4 vs Positive | 0.000385068 | Significant |

| Antibiotic | Bacteria      | Comparison           | p-values    | Significant |
|------------|---------------|----------------------|-------------|-------------|
| CIP        | <i>E.coli</i> | Sample 1 vs Negative | 0.000922084 | Significant |
|            |               | Sample 1 vs Positive | 0.000175635 | Significant |
|            |               | Sample 2 vs Negative | 0.000172132 | Significant |
|            |               | Sample 2 vs Positive | 0.001245812 | Significant |
|            |               | Sample 3 vs Negative | 0.000578202 | Significant |
|            |               | Sample 3 vs Positive | 0.000116779 | Significant |
|            |               | Sample 4 vs Negative | 0.00196657  | Significant |
|            |               | Sample 4 vs Positive | 3.1443E-05  | Significant |

| Antibiotic | Bacteria        | Comparison           | p-values    | Significant |
|------------|-----------------|----------------------|-------------|-------------|
| CIP        | <i>B.cereus</i> | Sample 1 vs Negative | 0.000222326 | Significant |
|            |                 | Sample 1 vs Positive | 0.000586774 | Significant |
|            |                 | Sample 2 vs Negative | 0.001151411 | Significant |
|            |                 | Sample 2 vs Positive | 9.09619E-05 | Significant |
|            |                 | Sample 3 vs Negative | 0.001478197 | Significant |
|            |                 | Sample 3 vs Positive | 5.16504E-05 | Significant |
|            |                 | Sample 4 vs Negative | 0.00196657  | Significant |

|  |  |                      |            |             |
|--|--|----------------------|------------|-------------|
|  |  | Sample 4 vs Positive | 3.1443E-05 | Significant |
|--|--|----------------------|------------|-------------|

| Antibiotic | Bacteria        | Comparison           | p-values    | Significant |
|------------|-----------------|----------------------|-------------|-------------|
| AM         | <i>B.cereus</i> | Sample 1 vs Negative | 0.000222326 | Significant |
|            |                 | Sample 1 vs Positive | 6.40646E-06 | Significant |
|            |                 | Sample 2 vs Negative | 0.001151411 | Significant |
|            |                 | Sample 2 vs Positive | 0.000651453 | Significant |
|            |                 | Sample 3 vs Negative | 0.001478197 | Significant |
|            |                 | Sample 3 vs Positive | 0.001245812 | Significant |
|            |                 | Sample 4 vs Negative | 0.00196657  | Significant |
|            |                 | Sample 4 vs Positive | 0.002854418 | Significant |

| Antibiotic | Bacteria      | Comparison           | p-values    | Significant |
|------------|---------------|----------------------|-------------|-------------|
| AM         | <i>E.coli</i> | Sample 1 vs Negative | 0.000922084 | Significant |
|            |               | Sample 1 vs Positive | 0.000339688 | Significant |
|            |               | Sample 2 vs Negative | 0.000172132 | Significant |
|            |               | Sample 2 vs Positive | 2.87419E-06 | Significant |
|            |               | Sample 3 vs Negative | 0.000578202 | Significant |
|            |               | Sample 3 vs Positive | 0.000175635 | Significant |
|            |               | Sample 4 vs Negative | 0.00196657  | Significant |
|            |               | Sample 4 vs Positive | 0.00226865  | Significant |

Table: ZOI (Zone of Inhibition) of different commercial antibiotics against gram-positive *B.cereus* and gram-negative *E.coli*

| <b>Bacteria</b>                                   | <b>CIP</b> | <b>PRL 100</b> | <b>AM</b> |
|---------------------------------------------------|------------|----------------|-----------|
| <i><b>B.cereus</b></i><br>Zone of inhibition (mm) | 31 ±1      | 22±1           | 7±0.5     |
| <i><b>E.Coli</b></i><br>Zone of inhibition (mm)   | 30±1       | 22±1           | 6.5±0.5   |

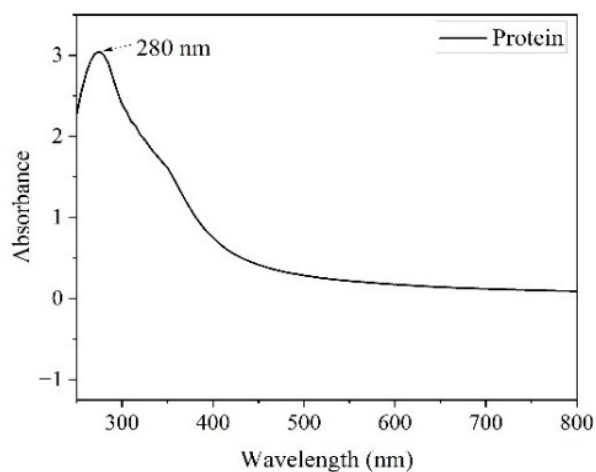

(a)

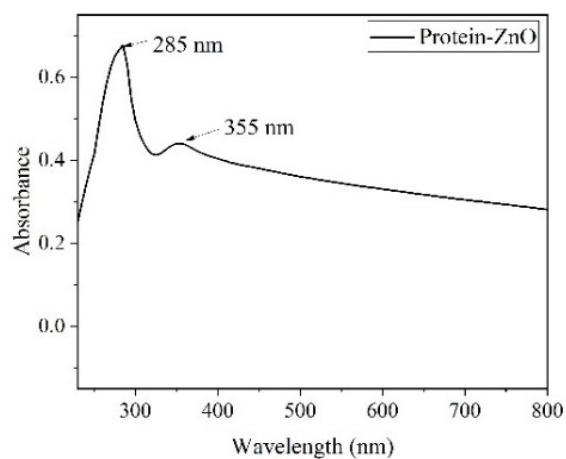

(b)

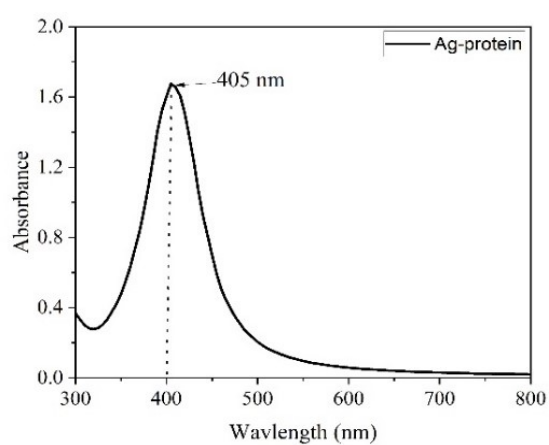

(c)

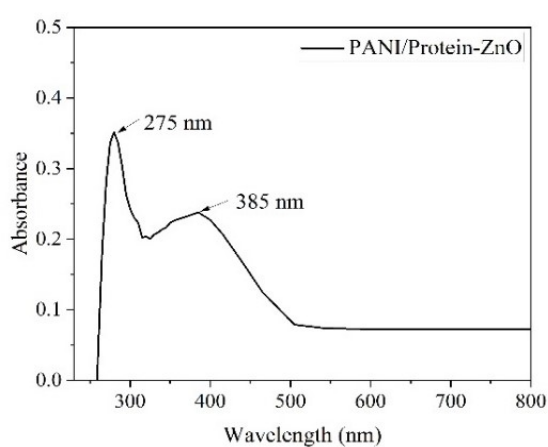

(d)

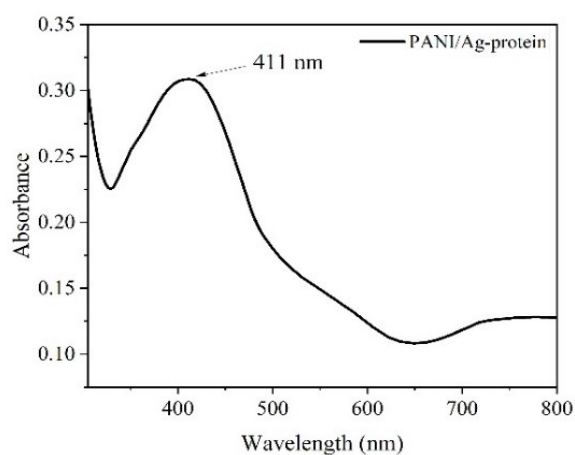

(e)

**Fig. S1** UV vis spectrum of (a) Protein, (b) Protein-ZnO, (c) Ag-Protein, (d) PANI/Protein-ZnO, and (e) PANI/Ag-Protein.



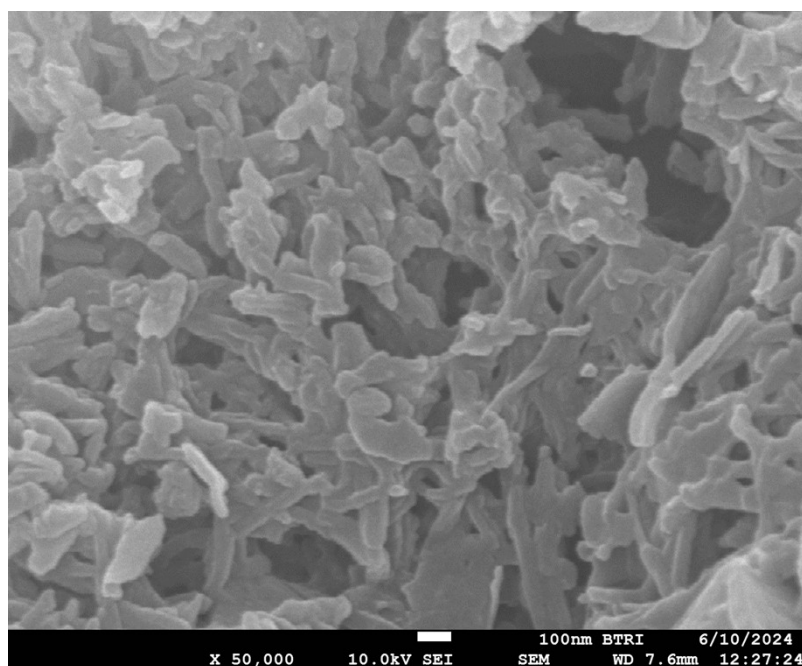

(a)

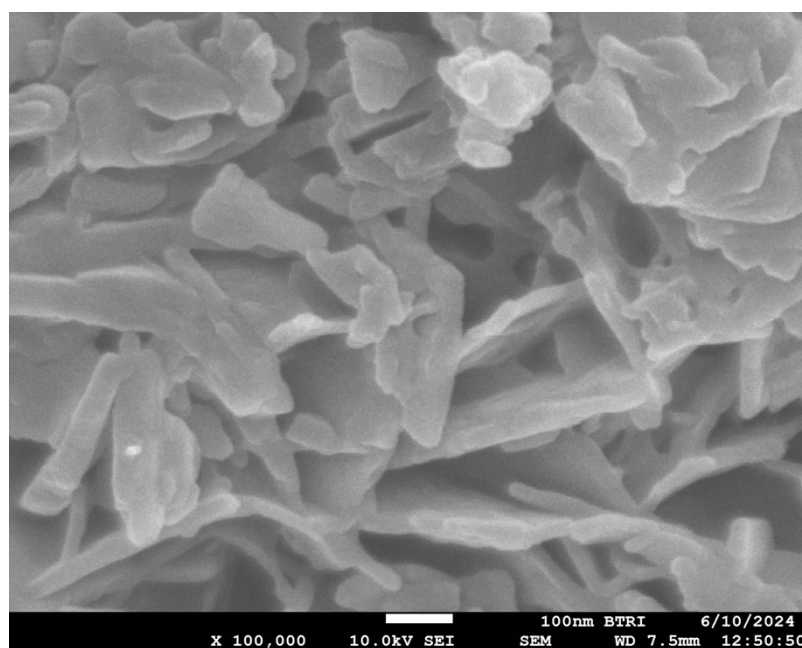

(b)

**Fig. S2** FESEM analysis of (a) PANI/Protein-ZnO and (b) PANI/Ag-Protein.

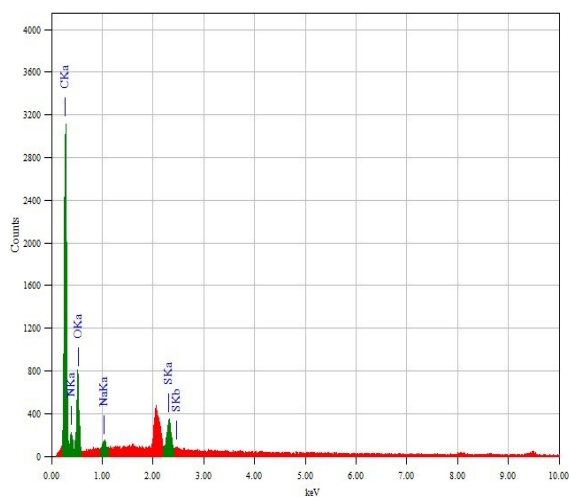

(a)

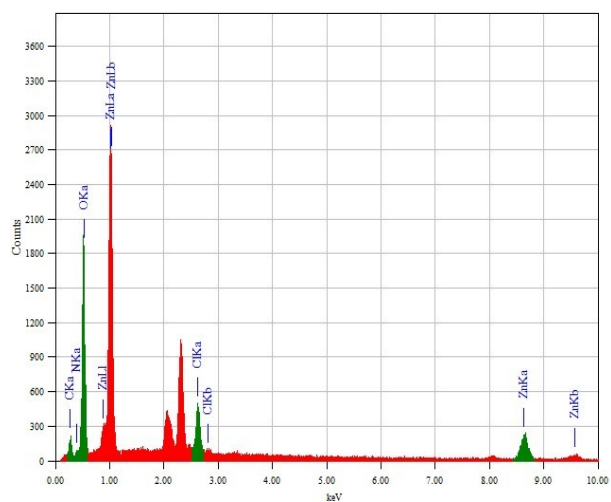

(b)

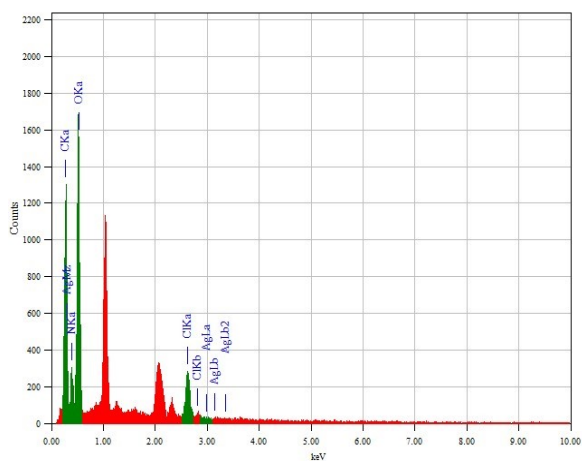

(c)

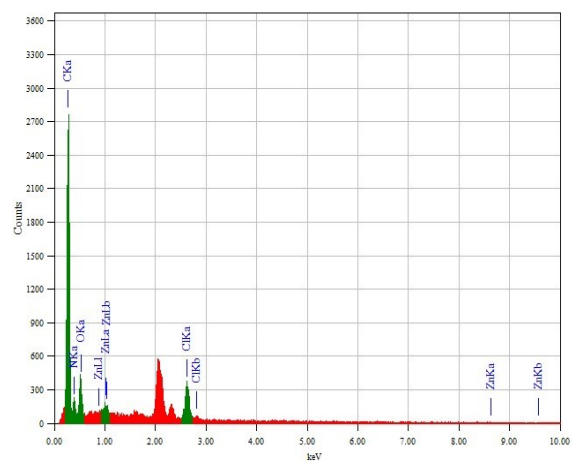

(d)

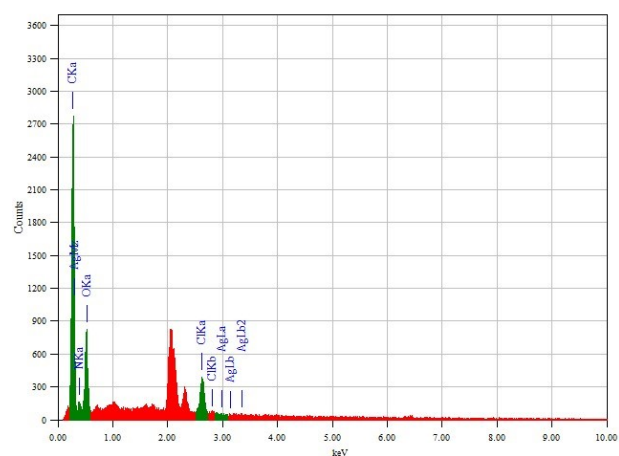

(e)

**Fig. S3** EDX analysis of (a) Protein, (b) Protein-ZnO, (c) Ag-Protein, (d) PANI/Protein-ZnO, and (e) PANI/Ag-Protein.

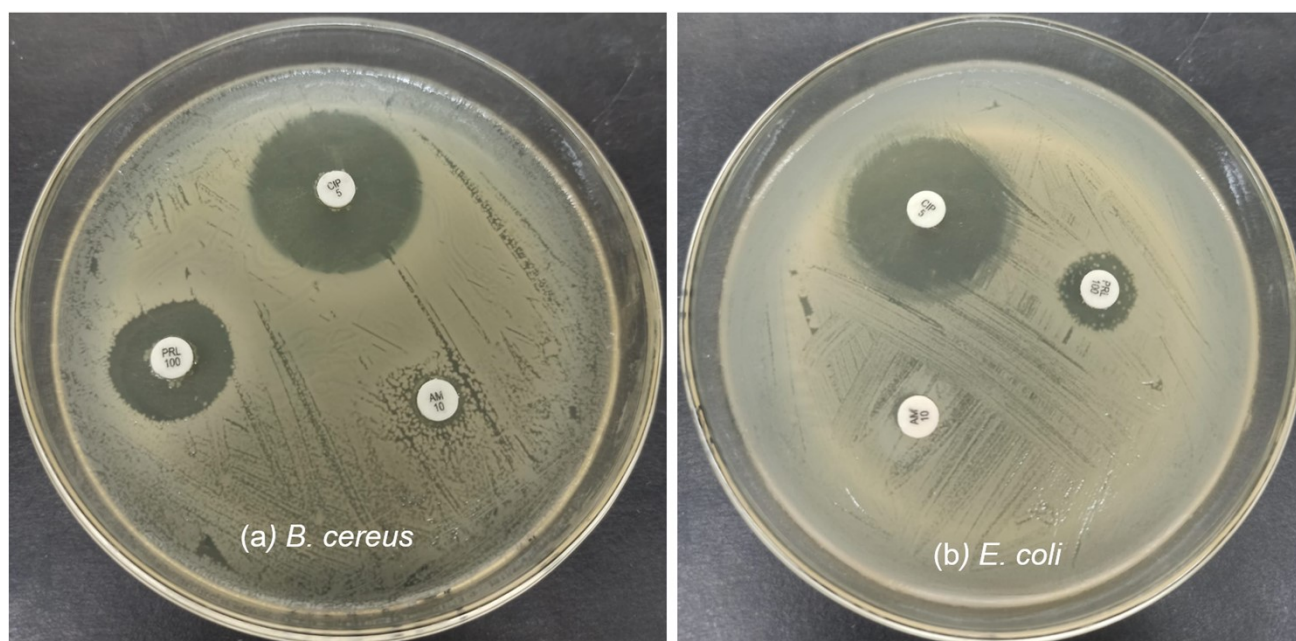

**Fig. S4** Zone of inhibition (ZOI) of the known antibiotic against (a) *B. cereus* and (b) *E. coli*.

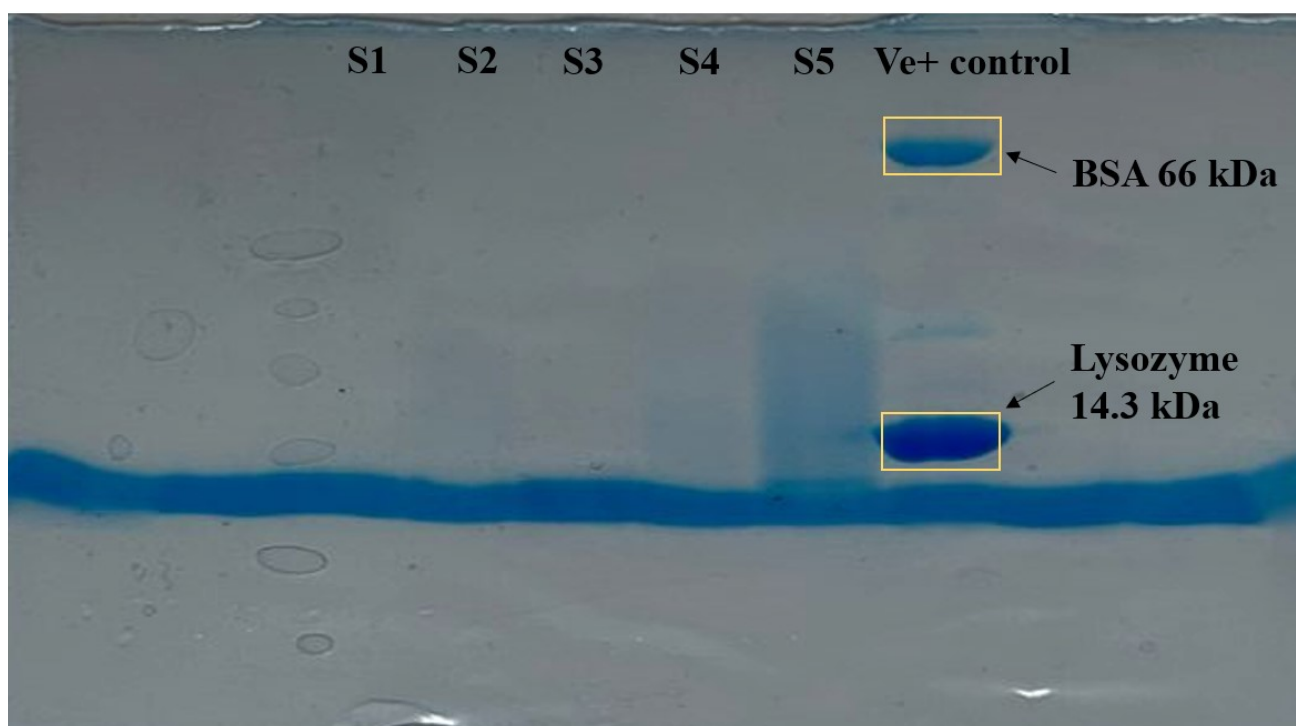

No visible protein bands were observed in S1-S4. S5 exhibited a smear instead of a distinct band.

**Fig. S5** Molecular weight distribution of S-1: Protein-ZnO, S-2: PANI/Protein-ZnO, S-3: PANI/Ag-protein, S-4: Ag-Protein, S-5: Protein hydrolysate from shaving dust.

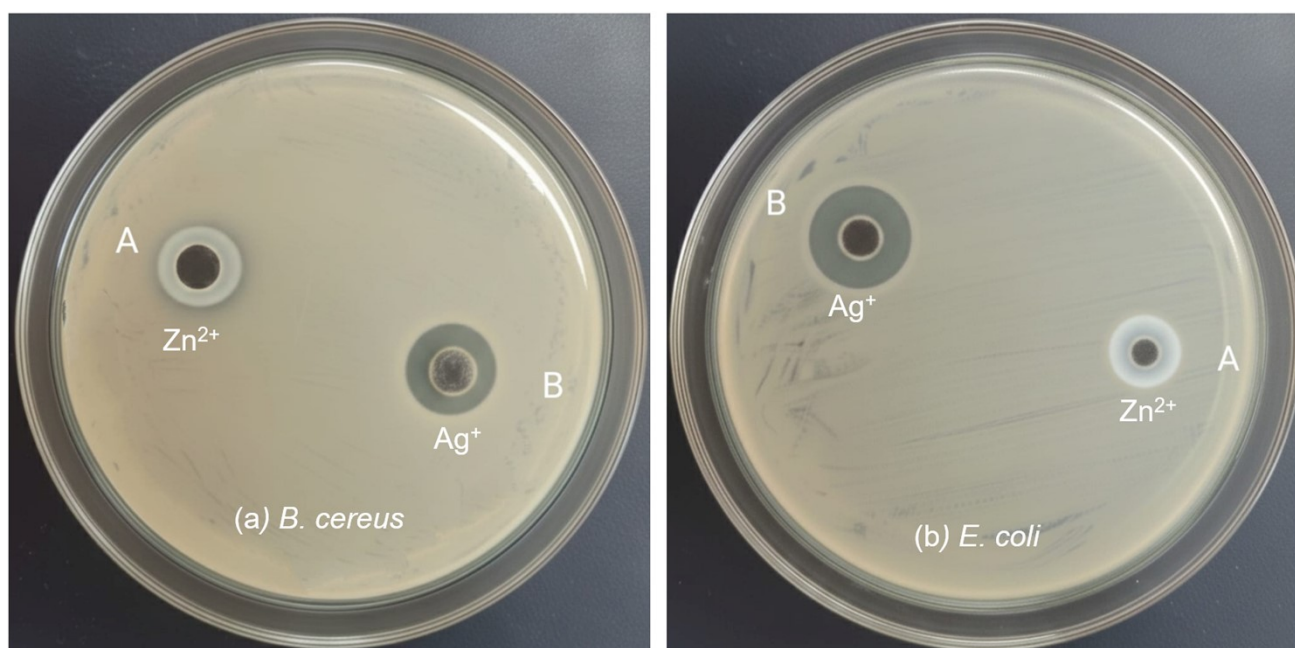

**Fig. S6** Ion release test using synthetically prepared  $\text{Zn}^{2+}$  and  $\text{Ag}^+$  solutions (1 M).

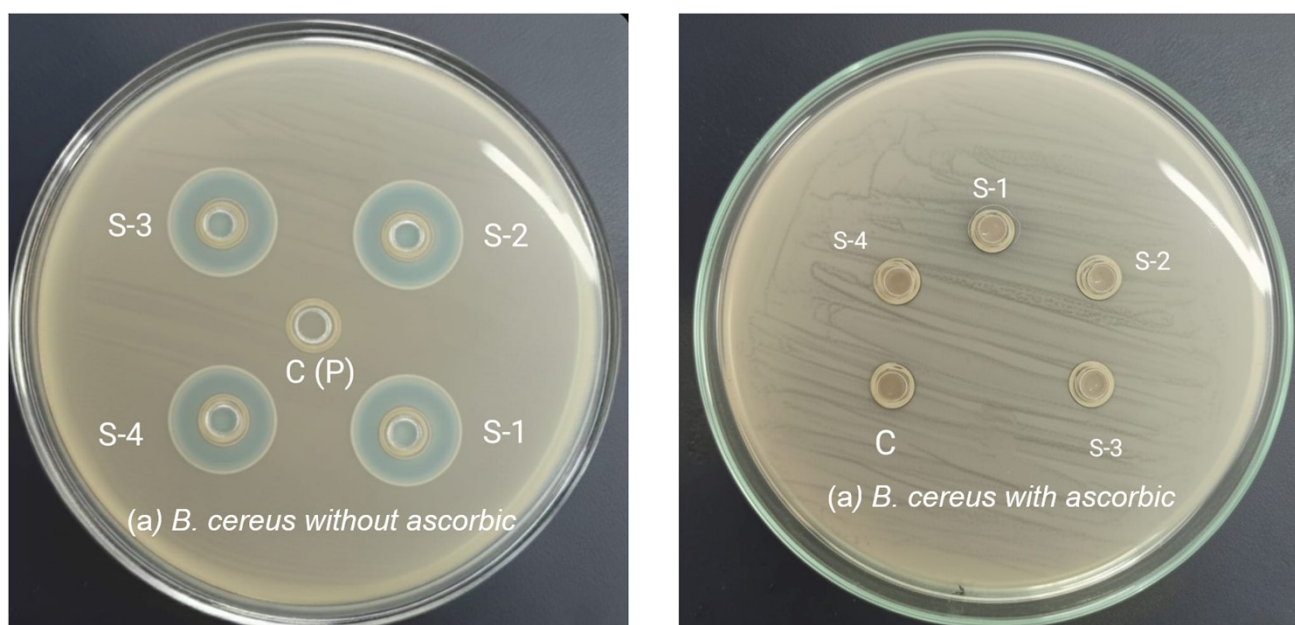



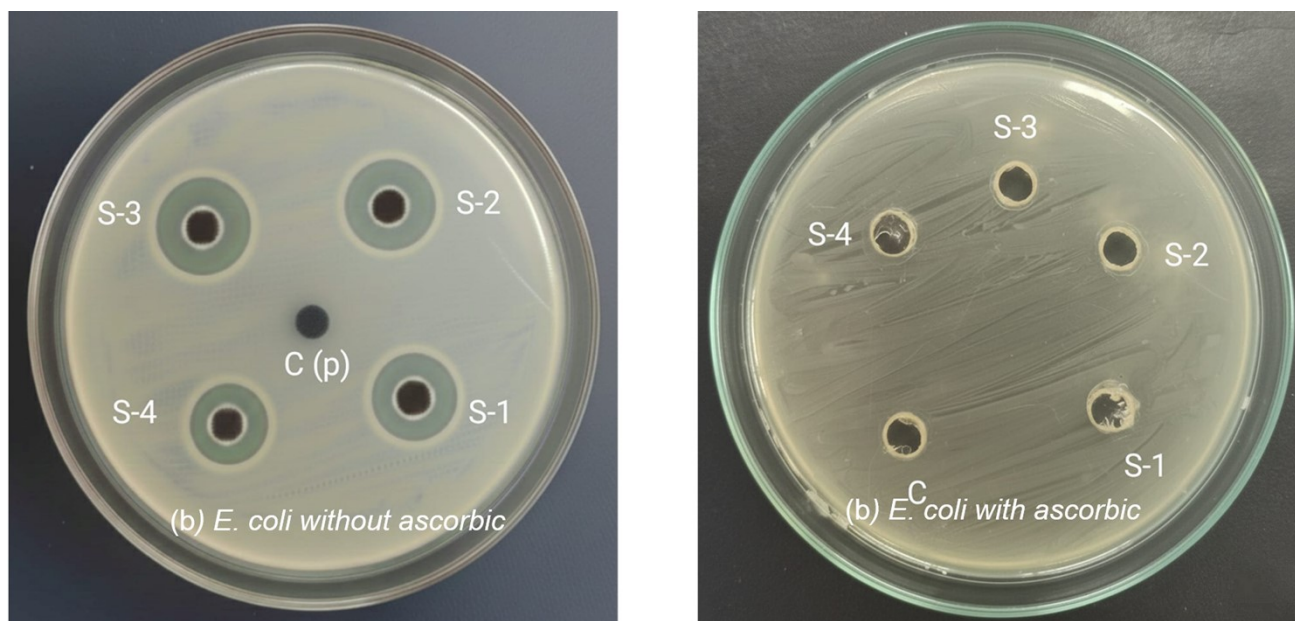

**Fig. S7** The effect of the antioxidant with/without ascorbic acid on the survival of (a) *B. Cereus* and (b) *E. coli*.

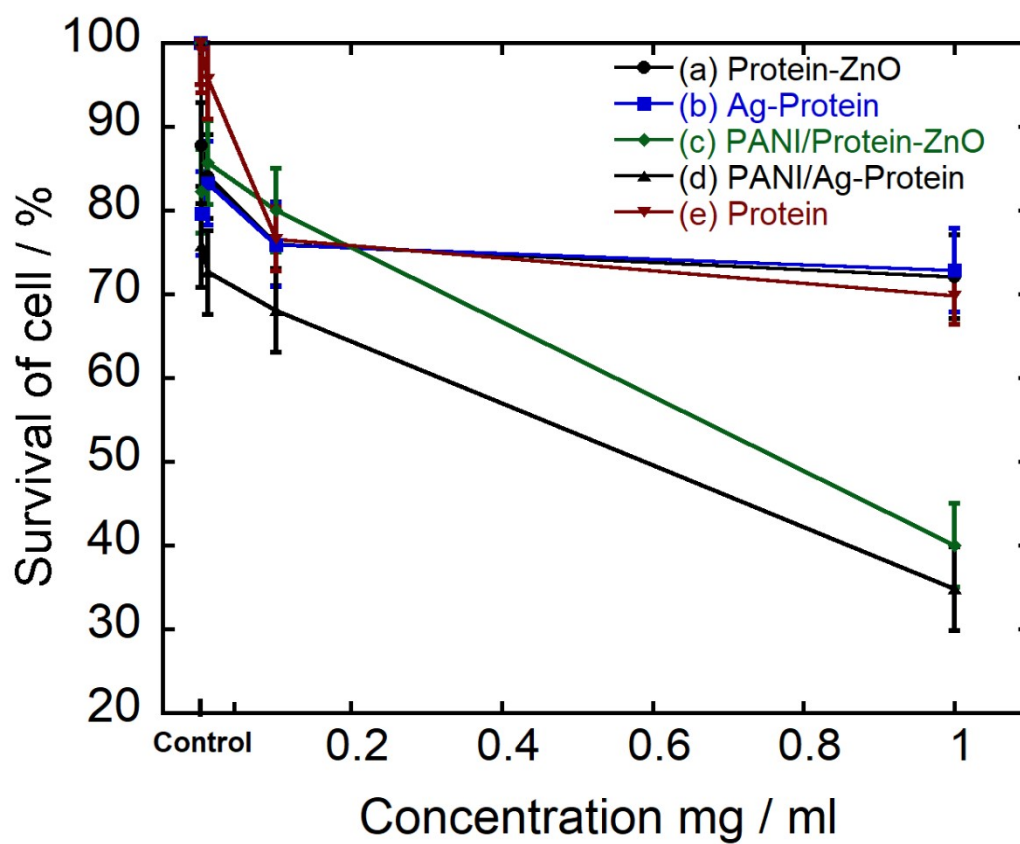

**Fig. S8** Cytotoxicity analysis after 24 h incubation of (a) Protein-ZnO, (b) Ag-protein, (c) PANI/protein-ZnO, (d) PANI/Ag-protein, and (e) Protein composites against Vero cell line

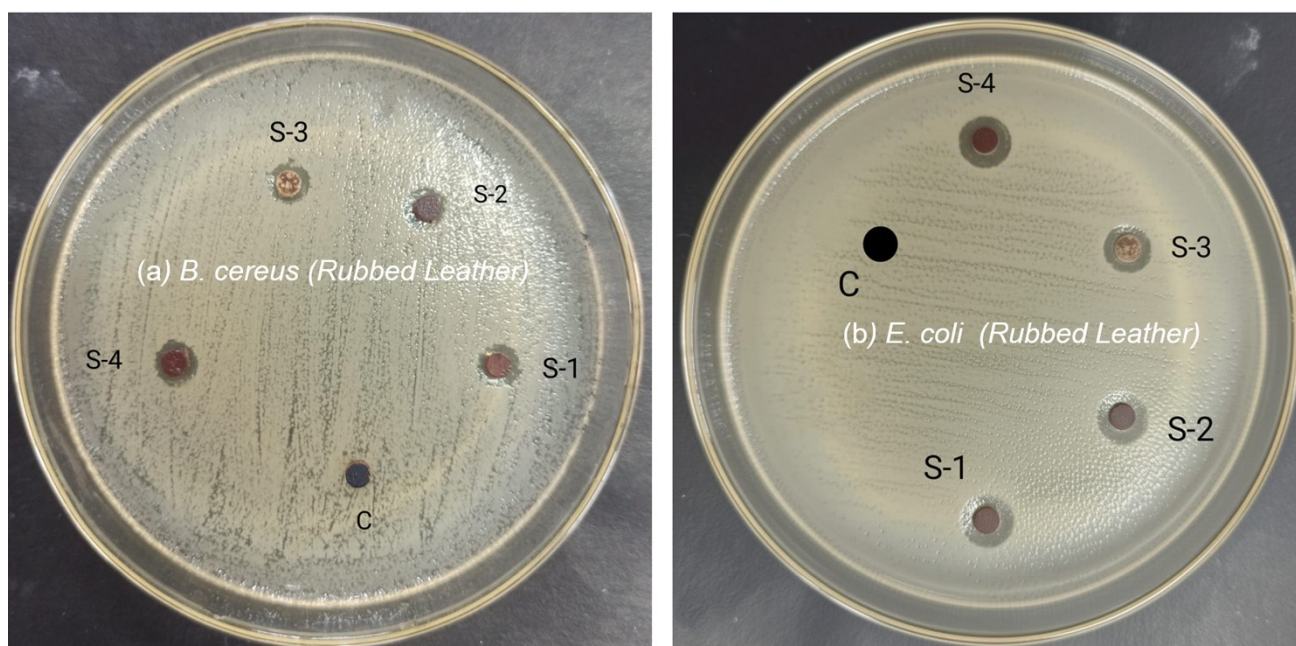

**Fig. S9** Re-evaluation of the antimicrobial activity of rubbed leather (a) *B. cereus* (b) *E. coli*. S-1: Protein-ZnO, S-2: Ag-protein, S-3: PANI/Protein-ZnO, S-4: PANI/Ag-protein C: Conventional finished rubbed leather
